# Supplementary material
Source: Research Square preprint supplement (doi:10.21203/rs.3.rs-8857089/v1)
Supplement: Supplementary file 1 [file 73d976fc66d2553d7720d966.xlsx]

## Sheet: Table S1
Table S1. Phenotypic variation and heritability of germination index in 245 wheat varieties and AA-RIL population from the cross between Annong 8455 (AN8455, weak dormancy) and Annong 1124 (AN1124, moderate dormancy)
Population	Environment	Range	Mean±SD	CV(%)	H2
245 wheat varieties	HF21	0.00-1.00	0.75±0.25	33.55	0.61
	JY21	0.42-1.00	0.90±0.09	10.47
	HB21	0.32-1.00	0.86±0.11	12.4
	HF22	0.00-0.95	0.38±0.11	58.81
	HB22	0.00-0.98	0.50±0.24	48.67
	SZ22	0.00-0.93	0.29±0.23	77.91
	LK22	0.02-0.98	0.44±0.24	53.5
	BLUP	0.28-0.89	0.59±0.14	23.41
AA-RIL	HF23	0.06-1.00	0.79±0.23	29.47	0.58
	HF24	0.01-0.36	0.17±0.09	52.56
	HB24	0.00-0.48	0.22±0.11	51.17
	BLUP	0.17-0.47	0.37±0.07	18.08
BLUP, best linear unbiased prediction
SD, standard deviation
CV, coefficient of variation
H2, broad-sense heritability

## Sheet: Table S2
Table S2. Primers used in this study.
	Marker name	F (5' primer)	R (3' primer)	Restriction enzyme
Markers used for validating the major locus Qgi.245.ahau-4B.3	CAPS-4B133585688	TTGCAGGTGAGGTAGATCGA	CTTCGCCAGGCTAAACATCA	BstNI
	CAPS-4B134825951	TCCCCATTGGAACCCTACAC	GGTCAGTCCTATGTGGCACT	PvuII
	CAPS-4B136057680	TTACATTACGCACAACTCCG	CCCAACGCTTACCAAAGTAG	MluCI
	CAPS-4B136673399	AGGAGTCCGAGAAGACAGAA	GGCAACTGTAAGTCGTCCAG	HphI
	CAPS-4B136676290	CTTTCCAGCGTCCTTAGCCA	AAAATAGTCTGACGAGGGAATCA	HpyCH4IV
	CAPS-4B137550147	CTACCATCACCAAGTCCACC	CAATACTCCCCTAACCCCAC	TaqI
	CAPS-4B137702342	TTTCTACGGCAACAAATCCC	TGAGGTCAAGTATCTCCAGG	DdeI
	CAPS-4B138299934	TCCATGTCGATGCTATACCA	AGCATGGTGGGGAAGTCTAT	StyI
	CAPS-4B139023243	GTGGTTTATTTGCTCTGCCG	GAACGCCAAGAAGAGGGAAA	HphI
	CAPS-4B139216006	GGCAAAGGTGAAGGAAACAC	AGCAGAGTTAGCAAGGACCA	BsrI
	CAPS-4B139323703	ACTGTCCTCCTTTGCCTACG	CAAAAGGCTCTCCAGAACGT	HhaI
	CAPS-4B139592387	GCAGAAACAAGAGACAGCGT	CTAAAGTCCTGGCACGAATC	Hpy188III
	CAPS-4B139766242	GCAGCATTTTTTGGGGGTCC	GGTGGCAAAAACCTCGTGTC	AluI
	CAPS-4B141949904	GCAGAATAGGATCAACCAGT	AAAAGTGAGGCGAATCCGTA	DdeI
	CAPS-4B141978849	GAAGTGGTCCTCGTTGACAG	GGGTCTGGATTTTTTGAGCC	MspI
	CAPS-4B144339677	TCGTGTTTAGCCGATAGCAG	GGGAGCGATCTTCTTAGTCG	BsmAI
	CAPS-4B145807856	GGGAAATCACTTGCTAACTC	CGAGACCCCAGAAATAATCA	BsaAI
qRT-PCR primers for detecting the expression of candidate genes	TraesCS4B02G117800	GAGCAGCACTTAGTGTGAA	ATTCGCTCTCCTCGCCCAAC
	TraesCS4B02G117900	GCGCAAATGGGTTCGTTCAG	GCTTCACGGATTTGCGCTGG
	TraesCS4B02G118000 (TaF-box-B1)	CCAACAGATTGCTCTCCCGT	GACCAACCATTTCGGGGTCT
	TraesCS4B02G118100	TCACCCCCTGCTCCTGGCT	CCTCTTGCGATGTCGGTGC
	TraesCS4B02G118200 (TaF-box-B2)	CCGGACTCCCTTCTAATCGG	CAGCGGCAAACCAATTGAAC
Primers used for cloning TaF-box-B1	TaF-box-B1-Q1	CTCCCCGAACGCCTTAGTTC	GCAAAAGCGGGTCTTGTGGG
	TaF-box-B1-Q2	TAGCCTTCGCTCCCATCCTC	GCAAGGCGTCTGAGGACGTT
	TaF-box-B1-CDS	TTCTACGGCAACAAATCCCG	GCATCTGCCTGCAAAAGAGT
Primers used for cloning TaF-box-B2	TaF-box-B2-Q1	GCCATACCCTCATAGCAGCA	CTGGATGGATCAAGTAGCCG
	TaF-box-B2-Q2	ATATGTCCTCCGCCTGCTTG	TTGCACAGGTCACAGAGAGG
	TaF-box-B2-CDS1	CGGACTCCCTTCTAATCGGA	GCCTTCACTTGCGGATATTC
	TaF-box-B2-CDS2	CTCCCGACAAGCTTCGTTAC	GGCTTGCTTGCTGTCTCAGA
Specific marker primers used for detecting TaF-box-B1 and TaF-box-B2	B1+65	TTTCTACGGCAACAAATCCC	TGAGGTCAAGTATCTCCAGG	DdeI
	B2+65	CGGAGTTTCTACGGAACAAG	GGCGTCTGAGGACGTTTGTA	DdeI

## Sheet: Table S3
Table S3. QTLs for seed dormancy by GWAS in 245 wheat varieties.
QTL	Marker	Chromosome	Position (bp)	.-log10 (P)	Marker R2 (%)	Environments	References
Qgi.245.ahau-1A.1	GENE-4832_103	1A	9643692	4.24204	6.95752	BB22
Qgi.245.ahau-1A.2	Excalibur_c39375_84	1A	58200776	5.35988	10.7329	HB21
Qgi.245.ahau-1A.3	RAC875_c19348_713	1A	74437174	5.27368	11.1279	HB21
Qgi.245.ahau-1A.4	wsnp_Ex_c12101_19360213	1A	82084141	4.94431	9.86069	HB21
Qgi.245.ahau-1A.5	Ra_c5696_1556	1A	95848534	5.09885	10.2031	HB21
	wsnp_Ex_c31525_40302747	1A	95848546	5.10264	10.1922	HB21
Qgi.245.ahau-1A.6	Tdurum_contig81875_148	1A	430600488	5.10264	10.1922	HB21
Qgi.245.ahau-1A.7	wsnp_Ex_c11939_19147790	1A	581585880	5.28773	10.6741	JY21
Qgi.245.ahau-1B	Tdurum_contig27843_375	1B	421671451	4.51909	9.04003	JY21
Qgi.245.ahau-1D.1	RAC875_c50872_470	1D	11177250	4.27216	7.20873	JY21
Qgi.245.ahau-1D.2	Tdurum_contig10964_143	1D	332703128	5.68106	9.76476	HB21
Qgi.245.ahau-1D.3	BS00111217_51	1D	452478572	5.02922	10.0383	HB21
	BobWhite_c4904_679	1D	452479287	5.0555	8.51205	JY21
Qgi.245.ahau-1D.4	RFL_Contig54_1297	1D	475817592	5.0555	8.51205	JY21
Qgi.245.ahau-2B.1	Kukri_c22513_1780	2B	14047161	4.30551	8.58333	JY21
Qgi.245.ahau-2B.2	Tdurum_contig47202_1699	2B	91837797	5.01481	10.1055	JY21
	Excalibur_rep_c68899_191	2B	91837797	4.6973	9.34123	JY21
Qgi.245.ahau-2B.3	Kukri_c4790_154	2B	105913020	4.91377	9.85955	JY21	Zhou et al., 2017
	Kukri_c40637_223	2B	108238043	4.27185	8.51342	JY21
Qgi.245.ahau-2B.4	wsnp_Ex_c2430_4546479	2B	120590347	4.98964	10.0193	JY21
	BobWhite_rep_c51373_453	2B	121367430	4.30203	8.52463	JY21
	IAAV7487	2B	121367459	4.30203	8.52463	JY21
Qgi.245.ahau-2B.5	wsnp_Ra_c67199_65253620	2B	131574747	4.45671	9.58462	JY21
Qgi.245.ahau-2B.6	Kukri_c67546_342	2B	140777083	4.29807	8.51219	JY21	Li et al., 2022
	Kukri_c39968_221	2B	140845993	4.28903	8.5491	JY21
	IAAV6994	2B	144431599	4.29807	8.51219	JY21
Qgi.245.ahau-2B.7	Kukri_c9281_71	2B	185761574	4.63693	9.21362	JY21
Qgi.245.ahau-2B.8	BS00076369_51	2B	381795128	4.06258	8.36767	JY21
	TA002695-2341	2B	381917348	4.49747	8.92438	JY21
Qgi.245.ahau-2B.9	wsnp_Ex_rep_c101477_86838533	2B	457680802	5.15553	9.61744	JY21
	Jagger_c2210_132	2B	458071515	5.1268	8.66569	JY21
Qgi.245.ahau-2B.10	Tdurum_contig61682_187	2B	476407626	4.29807	8.51219	JY21
	Tdurum_contig11172_443	2B	476563278	4.29807	8.51219	JY21
Qgi.245.ahau-2B.11	wsnp_Ex_c128_255285	2B	529108090	4.33462	8.58762	JY21
Qgi.245.ahau-2B.12	Kukri_c20939_226	2B	646211347	4.29807	8.51219	JY21
Qgi.245.ahau-2D.1	RFL_Contig4177_400	2D	233426963	4.98588	8.86236	JY21
Qgi.245.ahau-2D.2	Jagger_c7882_154	2D	650322164	4.39-6.97	7.76-13.00	HB21/HB22/JY21/BB22/SZ22/BLUP	Zhu et al., 2019
Qgi.245.ahau-3A.1	Kukri_c47441_194	3A	20714635	4.47391	8.8756	JY21
Qgi.245.ahau-3A.2	D_GBB4FNX02JKG8H_167	3A	45084434	4.70287	9.36333	JY21
Qgi.245.ahau-3A.3	RAC875_c15055_393	3A	501889693	4.47391	8.8756	JY21
Qgi.245.ahau-3B.1	Excalibur_c14551_1061	3B	491371398	4.47391	8.8756	JY21
Qgi.245.ahau-3B.2	GENE-1167_104	3B	684256078	4.81293	9.6039	JY21
Qgi.245.ahau-3D.1	Excalibur_c40068_522	3D	33161791	4.38363	9.22745	JY21
Qgi.245.ahau-3D.2	RFL_Contig4907_1336	3D	376820362	4.47391	8.8756	JY21
Qgi.245.ahau-3D.3	STS-Myb	3D	570801571	4.08-4.79	6.86-8.16	HF21/BB22/BLUP	Lang et al., 2021
Qgi.245.ahau-4B.1	IACX47	4B	31708614	5.696	10.7547	HB21	Kumar et al., 2015
Qgi.245.ahau-4B.2	RAC875_c1970_559	4B	40783533	4.47391	8.8756	JY21
	BobWhite_c37237_278	4B	40870535	5.0555	8.51205	JY21
Qgi.245.ahau-4B.3	BS00022090_51	4B	139755285	4.18-6.14	9.09-13.90	HB21/HB22/JY21/BB22/BLUP
Qgi.245.ahau-5A.1	Excalibur_rep_c104815_1181	5A	3402300	4.30864	8.534	JY21	Zhu et al., 2019
Qgi.245.ahau-5A.2	BobWhite_c9931_748	5A	466613986	4.9168	9.8832	JY21
Qgi.245.ahau-5A.3	IAAV1650	5A	584614282	4.35599	8.6465	JY21
	RAC875_c13931_205	5A	585068187	5.08276	11.1829	JY21
Qgi.245.ahau-5A.4	tplb0049a09_2097	5A	698002707	4.49747	8.92438	JY21
Qgi.245.ahau-5B.1	CAP7_c319_166	5B	510294594	4.46418	9.09368	JY21
Qgi.245.ahau-5B.2	Excalibur_c9543_1268	5B	685637129	4.77839	10.2676	JY21
Qgi.245.ahau-5D	GENE-3619_813	5D	441104725	4.7163	9.43812	JY21
Qgi.245.ahau-6B	RAC875_c13920_836	6B	42778487	4.32677	8.57142	JY21
Qgi.245.ahau-6D	tplb0025h02_894	6D	459698562	4.68746	9.3205	JY21
Qgi.245.ahau-7A.1	BS00023055_51	7A	41959666	4.43767	8.84921	HB21
Qgi.245.ahau-7A.2	wsnp_Ex_c53019_56399917	7A	660550228	4.24063	7.06229	BB22
Qgi.245.ahau-7B.1	Kukri_c61145_539	7B	115813034	4.46777	8.86288	JY21
Qgi.245.ahau-7B.2	TA003961-0636	7B	183307466	4.11831	6.69492	HB21
	BS00028793_51	7B	184983945	4.82868	9.70345	HB21
	Kukri_c78330_327	7B	185624086	4.09019	8.17302	HB21
Qgi.245.ahau-7B.3	Tdurum_contig75931_1967	7B	190801341	4.03771	8.19947	HB21
Qgi.245.ahau-7B.4	BobWhite_rep_c49587_1050	7B	488704731	4.47391	8.8756	JY21
Qgi.245.ahau-7B.5	wsnp_Ku_c17161_26193672	7B	627300017	4.06-4.17	6.64-6.86	HB22/BB22
Qgi.245.ahau-7D.1	D_contig50905_592	7D	2334942	5.02542	10.2635	HB21
Qgi.245.ahau-7D.2	Kukri_c41924_118	7D	86061212	4.46858	8.86457	JY21
Position, Physical position is based on IWGSC RefSeq v1.0

## Sheet: Table S4
Table S4. The major QTL Qgi.245.ahau-4B.3 for seed dormancy by Re-GWAS
QTL	Marker	Chromosome	Position (bp)	.-log10(P)	MarkerR2 (%)	Environments
Qgi.245.ahau-4B.3	CAPS-4B133585688	4B	133585688	4.25-5.30	6.94-9.00	HB21/HB22/HF22/JY21/BB22/SZ22/BLUP
	CAPS-4B134825951	4B	134825951	4.56-4.79	7.55-7.99	JY21/BB22/BLUP
	CAPS-4B136057680	4B	136057680	4.21-5.34	6.86-9.09	HB21/HB22/HF22/JY21/BB22/BLUP
	CAPS-4B136673399	4B	136673399	4.06-6.10	6.58-10.59	JY21/BB22/SZ22/BLUP
	CAPS-4B136676290	4B	136676290	4.45-5.47	7.33-9.34	HB22/JY21/BB22/SZ22/BLUP
	CAPS-4B137550147	4B	137550147	4.63-5.29	7.69-9.00	HB21/HB22/JY21/BB22/BLUP
	CAPS-4B137702342	4B	137702342	4.22-5.82	7.09-10.74	HB21/HB22/HF22/JY21/BB22/SZ22/BLUP
	CAPS-4B138299934	4B	138299934	4.61-7.66	7.63-13.84	HB21/HB22/HF22/JY21/BB22/SZ22/BLUP
	CAPS-4B139023243	4B	139023243	4.25-5.64	7.71-9.69	HB22/JY21/BLUP
	CAPS-4B139216006	4B	139216006	4.59-6.68	7.61-11.79	HB21/HB22/HF22/JY21/BB22/SZ22/BLUP
	CAPS-4B139323703	4B	139323703	4.70-6.78	7.82-12.01	HB21/HB22/HF22/JY21/BB22/SZ22/BLUP
	BS00022090_51	4B	139755285	4.09-5.31	8.50-11.36	HB21/JY21/BB22/BLUP
	CAPS-4B139766242	4B	139766242	4.21-5.54	7.78-9.54	HB22/HF22/JY21/BB22/SZ22/BLUP
	CAPS-4B141949904	4B	141949904	4.10-5.63	6.66-9.67	HB22/HF22/JY21/BB22/SZ22/BLUP
	CAPS-4B141978849	4B	141978849	4.29-5.66	7.02-9.73	HB21/HB22/JY21/BB22/SZ22/BLUP
	CAPS-4B144339677	4B	144339677	4.01-4.97	6.49-8.35	HB21/HB22/JY21/BB22/SZ22/BLUP
	CAPS-4B145807856	4B	145807856	4.74-5.48	7.90-9.45	HB22/BB22/SZ22/BLUP

## Sheet: Table S5
Table S5. High-density genetic map of the AA-RIL population
Chromosome	Number of markers	Genetic distance (cM)
1A	198	263.818
1B	312	168.033
1D	45	190.73
2A	388	416.431
2B	188	292.127
2D	26	117.643
3A	199	360.488
3B	443	353.925
3D	61	188.5
4A	58	282.976
4B	209	250.14
4D	28	142.332
5A	277	322.235
5B	234	390.252
5D	42	258.878
6A	56	136.094
6B	194	262.863
6D	56	142.935
7A	186	386.92
7B	201	247.762
7D	48	274.241

## Sheet: Table S6
Table S6. QTL mapping of seed dormancy using the AA-RIL population
QTL	TraitName	Chromosome	Position (cM)	LeftMarker	LeftMarker position (bp)	RightMarker	RightMarker position (bp)	LOD	PVE(%)	Add	LeftCI	RightCI
Qgi.AA.ahau-1A	HF23	1A	83	1A_552107335	552107335	1A_581255907	581255907	5.4835	7.3488	-0.13	81.5	83.5
Qgi.AA.ahau-3A	HB24	3A	79	3A_90	90	3A_711264328	711264328	6.7643	18.9967	0.0501	72.5	85.5
	HF24	3A	80	3A_90	90	3A_711264328	711264328	5.57	14.5357	0.0347	73.5	86.5
	BLUP	3A	81	3A_90	90	3A_711264328	711264328	5.8576	9.7604	0.0233	74.5	84.5
Qgi.AA.ahau-3D	BLUP	3D	51	3d_766	766	STS-Myb	570801571	5.9049	14.7463	0.0287	40.5	69.5
	HF23	3D	52	3d_766	766	STS-Myb	570801571	5.6299	13.8991	0.1071	40.5	69.5
Qgi.AA.ahau-4A	HF23	4A	91	4A_597902303	597902303	4A_593926870	593926870	4.8724	7.4892	0.079	85.5	95.5
	BLUP	4A	101	4A_593926870	593926870	4A_586331219	586331219	2.7364	3.2989	0.0137	95.5	101.5
Qgi.AA.ahau-4B	HF23	4B	137	CAPS-4B136673399	136673399	CAPS-4B138299934	138299934	15.4689	23.1982	-0.1419	136.5	138.5
	HF24	4B	137	CAPS-4B136673399	136673399	CAPS-4B138299934	138299934	12.1834	24.3061	-0.0463	136.5	138.5
	HB24	4B	137	CAPS-4B136673399	136673399	CAPS-4B138299934	138299934	4.823	9.6061	-0.0367	136.5	137.5
	BLUP	4B	137	CAPS-4B136673399	136673399	CAPS-4B138299934	138299934	17.1581	25.1185	-0.0384	136.5	137.5
Qgi.AA.ahau-4D	HF23	4D	126	4D_431041993	431041993	4D_481390025	481390025	4.5074	5.7637	-0.0991	125.5	127.5
Qgi.AA.ahau-5B	BLUP	5B	295	5B_24043765	24043765	5B_24292350	24292350	4.1459	5.0673	-0.0214	294.5	297.5
Qgi.AA.ahau-7B	BLUP	7B	153	7B_2340571	2340571	7B_11708841	11708841	5.1091	6.5988	-0.0304	150.5	157.5

## Sheet: Table S7
Table S7. The candidate genes underlying Qgi.245.ahau-4B.3
Gene ID in CS	Position	Annotation
TraesCS4B02G117800	136669767-136673921	Signal recognition particle 54 kDa protein
TraesCS4B02G117900	136675447-136680819	Signal recognition particle 54 kDa protein
TraesCS4B02G118000	137702279-137703601	F-box family protein
TraesCS4B02G118100	137740238-137742041	PRA1 family protein
TraesCS4B02G118200	138275931-138277570	F-box family protein

## Sheet: Table S8
Table S8. Sequence variations of the candidate genes TaF-box-B1 and TaF-box-B2 in Annong 8455 and Annong 1124.
Gene	Position	Annong 8455	Annong 1124	Variant	Position of SNP change	Amino acid/cis-element change	Position of amino acid change
TaF-box-B1	137700982	G	C	upstream_gene_variant	.-1297	-	-
	137701458	T	C	upstream_gene_variant	.-821	CGTCA-motif/TGACG-motif	-
	137701475	A	G	upstream_gene_variant	.-804	ABRE/G-box	-
	137702341	A	del A	frameshift_variant	.+65	Lys acid to fs	22
	137703267	A	G	missense_variant	.+989	Glu acid to Gly	330
	137703369	C	T	missense_variant	.+1091	Ala acid to Val	364
TaF-box-B2	138274743	A	G	upstream_gene_variant	.-1306	-	-
	138274764	A	G	upstream_gene_variant	.-1285	-	-
	138274858	T	C	upstream_gene_variant	.-1191	A-box/CCGTCC-motif	-
	138275206	G	A	upstream_gene_variant	.-843	-	-
	138275630	G	A	upstream_gene_variant	.-419	-	-
	138275878	T	C	5'UTR_variant	.-171	-	-
	138275893	C	CCTT	5'UTR_variant	.-153_-151	-	-
	138276113	A	G	missense_variant	.+65	Lys acid to Arg	22
	138277283	T	C	missense_variant	.+1235	Met acid to Thr	412

## Sheet: Table S9
Table S9. Haplotype analysis of TaF-box-B1and TaF-box-B2 based on the resequencing datasets of 145 wheat germplasms.
Genes	TaF-box-B1							TaF-box-B2
Region	Promoter	Promoter	Promoter	Coding region	Coding region	Coding region	The Haplotype of TaF-box-B1	Promoter	Promoter	Promoter	Promoter	Promoter	5'UTR	5'UTR	Coding region	Coding region	The Haplotype of TaF-box-B1
POS	.-1297 bp	.-821 bp	.-804 bp	.+65 bp	.+989 bp	.+1091 bp		.-1306 bp	.-1285 bp	.-1191 bp	.-843 bp	.-419 bp	.-171 bp	.-153_-151 bp	.+65 bp	.+1235 bp
REF	G	T	A	A	A	C		A	A	T	G	G	T	C	A	T
ALT	C	C	G	del A	G	T		G	G	C	A	A	C	CCTT	G	C
MP001	G	T	A	A	A	C	B1-Hap2	A	A	T	G	G	T	C	A	T	B2-Hap2
MP002	C	C	G	del A	G	T	B1-Hap1	G	G	C	A	A	C	CCTT	G	C	B2-Hap1
MP003	G	T	A	A	A	C	B1-Hap2	A	A	T	G	G	T	C	A	T	B2-Hap2
MP004	G	T	A	A	A	C	B1-Hap2	A	A	T	G	G	T	C	A	T	B2-Hap2
MP005	G	T	A	A	A	C	B1-Hap2	A	A	T	G	G	T	C	A	T	B2-Hap2
MP006	C	C	G	del A	G	T	B1-Hap1	G	G	C	A	N	C	CCTT	G	C
MP007	G	T	A	A	A	C	B1-Hap2	A	A	T	G	G	T	C	A	T	B2-Hap2
MP008	C	C	G	del A	G	T	B1-Hap1	G	G	C	A	A	C	CCTT	G	C	B2-Hap1
MP009	G	T	A	A	A	C	B1-Hap2	A	A	T	G	G	T	C	A	T	B2-Hap2
MP010	G	T	A	A	A	C	B1-Hap2	A	A	T	G	G	T	C	A	T	B2-Hap2
MP011	G	T	A	N	A	C		A	A	T	G	G	T	C	A	T	B2-Hap2
MP012	G	T	A	A	A	C	B1-Hap2	A	A	T	G	G	T	C	A	T	B2-Hap2
MP013	G	T	A	A	A	C	B1-Hap2	A	A	T	G	G	T	C	A	T	B2-Hap2
MP014	G	T	A	A	A	C	B1-Hap2	A	A	T	G	G	T	C	A	T	B2-Hap2
MP015	C	C	G	del A	G	T	B1-Hap1	G	G	C	A	A	C	CCTT	G	C	B2-Hap1
MP016	G	T	A	A	A	C	B1-Hap2	A	A	T	G	G	T	C	A	T	B2-Hap2
MP017	G	T	A	A	A	C	B1-Hap2	A	A	T	G	G	T	C	A	T	B2-Hap2
MP018	C	C	G	del A	G	T	B1-Hap1	G	G	C	A	A	C	CCTT	G	C	B2-Hap1
MP019	C	C	G	del A	G	T	B1-Hap1	G	G	C	A	A	C	CCTT	G	C	B2-Hap1
MP020	G	T	A	A	A	C	B1-Hap2	A	A	T	G	G	T	C	A	T	B2-Hap2
MP021	G	T	A	A	A	C	B1-Hap2	A	A	T	G	G	T	C	A	T	B2-Hap2
MP022	G	T	A	A	A	C	B1-Hap2	A	A	T	G	G	T	C	A	T	B2-Hap2
MP023	G	T	A	A	A	C	B1-Hap2	A	A	T	G	G	T	C	A	T	B2-Hap2
MP024	G	T	A	A	A	C	B1-Hap2	A	A	T	G	G	T	C	A	T	B2-Hap2
MP025	G	T	A	A	A	C	B1-Hap2	A	A	T	G	G	T	C	A	T	B2-Hap2
MP026	G	T	A	A	A	C	B1-Hap2	A	A	T	G	G	T	C	A	T	B2-Hap2
MP027	G	T	A	A	A	C	B1-Hap2	A	A	T	G	G	T	C	A	T	B2-Hap2
MP028	C	C	G	del A	G	T	B1-Hap1	G	G	C	A	A	C	CCTT	G	C	B2-Hap1
MP029	G	T	A	A	A	C	B1-Hap2	A	A	T	G	G	T	C	A	T	B2-Hap2
MP030	G	T	A	A	A	C	B1-Hap2	A	A	N	G	G	T	C	A	T
MP031	G	T	A	A	A	C	B1-Hap2	A	A	T	G	G	T	C	A	T	B2-Hap2
MP032	G	T	A	A	A	C	B1-Hap2	A	A	T	G	G	T	C	A	T	B2-Hap2
MP033	G	T	A	A	A	C	B1-Hap2	A	A	T	G	G	T	C	A	T	B2-Hap2
MP034	G	T	A	A	A	C	B1-Hap2	A	A	T	G	G	T	C	A	T	B2-Hap2
MP035	G	T	A	A	A	C	B1-Hap2	A	A	T	G	G	T	C	A	T	B2-Hap2
MP036	G	T	A	A	A	C	B1-Hap2	A	A	T	G	G	T	C	A	T	B2-Hap2
MP037	C	C	G	del A	G	T	B1-Hap1	G	G	C	A	A	C	CCTT	G	C	B2-Hap1
MP038	G	T	A	A	A	C	B1-Hap2	A	A	T	G	G	T	C	A	T	B2-Hap2
MP039	G	T	A	A	A	C	B1-Hap2	A	A	T	G	G	T	C	A	T	B2-Hap2
MP040	G	T	A	A	A	C	B1-Hap2	A	A	T	G	G	T	C	A	T	B2-Hap2
MP041	G	T	A	A	A	C	B1-Hap2	A	A	T	G	G	T	C	A	T	B2-Hap2
MP042	G	T	A	A	A	C	B1-Hap2	A	A	T	G	G	T	C	A	T	B2-Hap2
MP043	C	C	G	del A	G	T	B1-Hap1	G	G	C	A	A	C	CCTT	G	C	B2-Hap1
MP044	G	T	A	A	A	N		A	A	T	G	G	T	C	A	T	B2-Hap2
MP045	G	T	A	A	A	C	B1-Hap2	A	A	T	G	G	T	C	A	T	B2-Hap2
MP046	G	T	A	A	A	C	B1-Hap2	A	A	T	G	G	T	C	A	T	B2-Hap2
MP047	G	T	A	A	A	C	B1-Hap2	A	A	T	G	G	T	C	A	T	B2-Hap2
MP048	C	C	G	del A	G	T	B1-Hap1	G	G	C	A	A	C	CCTT	G	C	B2-Hap1
MP049	G	T	A	A	A	C	B1-Hap2	A	A	T	G	G	T	C	A	T	B2-Hap2
MP050	C	C	G	del A	G	T	B1-Hap1	G	G	C	A	N	C	CCTT	G	C
MP051	G	T	A	A	A	C	B1-Hap2	A	A	T	G	G	T	C	A	N
MP052	G	T	A	A	A	C	B1-Hap2	A	A	T	G	G	T	C	A	T	B2-Hap2
MP053	G	T	A	A	A	C	B1-Hap2	A	A	T	G	G	T	C	A	T	B2-Hap2
MP054	G	T	A	A	A	C	B1-Hap2	A	A	T	G	G	T	C	A	T	B2-Hap2
MP055	G	T	A	A	A	C	B1-Hap2	A	A	T	G	G	T	C	A	T	B2-Hap2
MP056	G	C	G	del A	G	T	B1-Hap1	G	G	C	A	A	C	CCTT	G	C	B2-Hap1
MP057	G	T	A	A	A	C	B1-Hap2	A	A	T	G	G	T	C	A	T	B2-Hap2
MP058	G	T	A	A	A	C	B1-Hap2	A	A	T	G	G	T	C	A	T	B2-Hap2
MP059	G	T	A	A	A	C	B1-Hap2	A	A	T	G	G	T	C	A	T	B2-Hap2
MP060	C	C	G	del A	G	T	B1-Hap1	G	G	C	A	A	C	CCTT	G	N
MP061	G	T	A	A	A	C	B1-Hap2	A	A	T	G	G	T	C	A	T	B2-Hap2
MP062	G	T	A	A	A	C	B1-Hap2	A	A	T	G	G	T	C	A	N
MP063	C	C	G	del A	G	T	B1-Hap1	G	N	N	A	A	C	CCTT	G	T
MP064	G	T	A	A	A	C	B1-Hap2	A	A	T	G	G	T	C	A	T	B2-Hap2
MP065	C	C	G	del A	G	T	B1-Hap1	G	G	C	A	N	C	CCTT	G	C
MP066	G	T	A	A	A	C	B1-Hap2	A	A	T	G	G	T	C	A	T	B2-Hap2
MP067	G	T	A	A	A	C	B1-Hap2	A	A	T	G	G	T	C	A	T	B2-Hap2
MP068	G	T	A	A	A	C	B1-Hap2	A	A	T	G	G	T	C	A	T	B2-Hap2
MP069	G	T	A	A	A	C	B1-Hap2	A	A	T	G	G	T	C	A	T	B2-Hap2
MP070	G	T	A	A	A	C	B1-Hap2	A	A	T	G	G	T	C	A	T	B2-Hap2
MP071	C	C	G	del A	G	T	B1-Hap1	G	G	C	A	A	C	CCTT	G	C	B2-Hap1
MP072	G	T	A	A	A	C	B1-Hap2	A	A	T	G	G	T	C	A	T	B2-Hap2
MP073	C	C	G	del A	G	T	B1-Hap1	G	G	C	A	A	C	CCTT	G	C	B2-Hap1
MP074	G	T	A	A	A	C	B1-Hap2	A	A	T	G	G	T	C	A	T	B2-Hap2
MP075	C	C	G	del A	G	T	B1-Hap1	G	G	C	A	N	N	N	G	C
MP076	G	T	A	A	A	C	B1-Hap2	A	A	T	G	G	T	C	A	T	B2-Hap2
MP077	C	C	G	del A	G	T	B1-Hap1	G	G	C	A	N	C	CCTT	G	C
MP078	G	T	A	N	A	N		N	N	N	N	N	N	N	N	T
MP079	G	T	A	A	A	C	B1-Hap2	A	A	T	G	G	T	C	A	T	B2-Hap2
MP080	G	T	A	A	A	C	B1-Hap2	A	A	T	G	G	T	C	A	T	B2-Hap2
MP081	G	T	A	A	A	C	B1-Hap2	A	A	T	G	G	T	C	A	T	B2-Hap2
MP082	G	T	A	A	A	C	B1-Hap2	A	A	T	G	G	T	C	A	T	B2-Hap2
MP083	G	T	A	A	A	C	B1-Hap2	A	A	T	G	G	T	C	A	T	B2-Hap2
MP084	G	T	A	A	A	C	B1-Hap2	A	A	T	G	G	T	C	A	T	B2-Hap2
MP085	G	T	A	A	A	C	B1-Hap2	A	A	T	G	G	T	C	A	T	B2-Hap2
MP086	G	T	A	A	A	C	B1-Hap2	A	A	T	G	G	T	C	A	T	B2-Hap2
MP087	G	T	A	A	A	C	B1-Hap2	A	A	T	G	G	T	C	A	T	B2-Hap2
MP088	C	C	G	del A	G	T	B1-Hap1	G	G	C	A	A	C	CCTT	G	C	B2-Hap1
MP089	G	T	A	A	A	C	B1-Hap2	A	A	T	G	G	T	C	A	T	B2-Hap2
MP090	G	T	A	A	A	C	B1-Hap2	A	A	T	G	G	T	C	A	T	B2-Hap2
MP091	G	T	A	A	A	C	B1-Hap2	A	A	T	G	G	T	C	A	T	B2-Hap2
MP092	C	C	G	del A	G	T	B1-Hap1	G	G	C	A	A	C	CCTT	G	C	B2-Hap1
MP093	G	T	A	A	A	C	B1-Hap2	A	A	T	G	G	T	C	A	T	B2-Hap2
MP094	G	T	A	A	A	C	B1-Hap2	N	A	T	G	G	T	C	A	T
MP095	C	C	G	del A	G	T	B1-Hap1	G	G	C	A	A	C	CCTT	G	C	B2-Hap1
MP096	G	T	A	A	A	C	B1-Hap2	A	A	T	G	G	T	C	A	T	B2-Hap2
MP097	G	T	A	A	A	C	B1-Hap2	A	A	T	G	G	T	C	A	T	B2-Hap2
MP098	G	T	A	A	A	C	B1-Hap2	A	A	T	G	G	T	C	A	T	B2-Hap2
MP099	G	T	A	A	A	C	B1-Hap2	A	A	T	G	G	T	C	A	T	B2-Hap2
MP100	C	C	G	del A	G	T	B1-Hap1	A	A	T	G	G	T	C	A	T	B2-Hap2
MP101	G	T	A	A	A	C	B1-Hap2	A	A	T	G	G	T	C	A	T	B2-Hap2
MP102	G	T	A	A	A	C	B1-Hap2	A	A	T	G	G	T	C	A	T	B2-Hap2
MP103	G	T	N	A	A	C		A	A	T	G	G	T	C	A	T	B2-Hap2
MP104	G	T	A	A	A	C	B1-Hap2	A	A	T	G	G	T	C	A	T	B2-Hap2
MP105	G	T	A	A	A	C	B1-Hap2	A	A	T	G	G	T	C	A	T	B2-Hap2
MP106	G	T	A	A	A	C	B1-Hap2	A	A	T	G	G	T	C	A	T	B2-Hap2
MP107	G	T	A	A	A	C	B1-Hap2	A	A	T	G	G	T	C	A	T	B2-Hap2
MP108	G	T	A	A	A	C	B1-Hap2	A	A	T	G	G	T	C	A	T	B2-Hap2
MP109	G	T	A	A	A	C	B1-Hap2	A	A	T	G	G	T	C	A	T	B2-Hap2
MP110	C	C	G	del A	G	T	B1-Hap1	G	G	C	A	N	C	CCTT	G	C
MP111	G	T	A	A	A	C	B1-Hap2	A	A	T	G	G	T	C	A	T	B2-Hap2
MP112	G	T	A	A	A	C	B1-Hap2	A	A	T	G	G	T	C	A	T	B2-Hap2
MP113	G	T	A	A	A	C	B1-Hap2	A	A	T	G	G	T	C	A	T	B2-Hap2
MP114	G	T	A	A	A	C	B1-Hap2	A	A	T	G	G	T	C	A	T	B2-Hap2
MP115	G	T	A	A	A	C	B1-Hap2	A	A	T	G	G	T	C	A	T	B2-Hap2
MP116	N	C	G	del A	G	T		G	G	C	A	A	C	CCTT	G	C	B2-Hap1
MP117	C	C	G	del A	G	T	B1-Hap1	G	G	C	A	A	C	CCTT	G	C	B2-Hap1
MP118	G	T	A	A	A	C	B1-Hap2	A	A	T	G	G	T	C	A	T	B2-Hap2
MP119	G	T	A	A	A	C	B1-Hap2	A	A	T	G	G	T	C	A	T	B2-Hap2
MP120	G	T	A	A	A	C	B1-Hap2	A	A	T	G	G	T	C	A	T	B2-Hap2
MP121	G	T	A	A	A	C	B1-Hap2	A	A	T	G	G	T	C	A	T	B2-Hap2
MP122	C	C	G	del A	G	T	B1-Hap1	G	G	C	A	N	C	CCTT	G	C
MP123	C	C	G	del A	G	T	B1-Hap1	G	G	C	A	A	C	CCTT	G	C	B2-Hap1
MP124	G	T	A	A	A	C	B1-Hap2	A	A	T	G	G	T	C	A	T	B2-Hap2
MP125	G	T	A	A	A	C	B1-Hap2	A	A	T	G	G	T	C	A	T	B2-Hap2
MP126	C	C	G	del A	G	T	B1-Hap1	G	G	C	A	A	C	CCTT	G	C	B2-Hap1
MP127	C	C	G	del A	G	T	B1-Hap1	G	G	C	A	A	C	CCTT	G	C	B2-Hap1
MP128	G	T	A	A	A	C	B1-Hap2	A	A	T	G	G	T	C	A	T	B2-Hap2
MP129	G	T	A	A	A	C	B1-Hap2	A	A	T	G	G	T	C	A	T	B2-Hap2
MP130	G	T	A	A	A	C	B1-Hap2	A	A	T	G	G	T	C	A	T	B2-Hap2
MP131	G	T	A	A	A	C	B1-Hap2	A	A	T	G	G	T	C	A	T	B2-Hap2
MP132	G	T	A	A	A	C	B1-Hap2	A	A	T	G	G	T	C	A	T	B2-Hap2
MP133	G	T	A	A	A	C	B1-Hap2	A	A	T	G	G	T	C	A	T	B2-Hap2
MP134	G	T	A	A	A	C	B1-Hap2	A	A	T	G	G	T	C	A	T	B2-Hap2
MP135	G	T	A	A	A	C	B1-Hap2	A	A	T	G	G	T	C	A	T	B2-Hap2
MP136	C	C	G	del A	G	T	B1-Hap1	G	G	C	A	A	C	CCTT	G	C	B2-Hap1
MP137	G	T	A	A	A	C	B1-Hap2	A	A	T	G	G	T	C	A	T	B2-Hap2
MP138	G	T	A	A	A	C	B1-Hap2	A	A	T	G	G	T	C	A	T	B2-Hap2
MP139	G	T	A	A	A	C	B1-Hap2	A	A	T	G	G	T	C	A	T	B2-Hap2
MP140	G	T	A	A	A	C	B1-Hap2	A	A	T	G	G	T	C	A	T	B2-Hap2
MP141	G	T	A	A	A	C	B1-Hap2	A	A	T	G	G	T	C	A	T	B2-Hap2
MP142	C	C	G	del A	G	T	B1-Hap1	G	G	C	A	N	C	CCTT	G	C
MP143	G	T	A	A	A	C	B1-Hap2	A	A	T	G	G	T	C	A	T	B2-Hap2
MP144	C	C	G	del A	G	T	B1-Hap1	G	G	C	A	N	C	CCTT	G	C
MP145	G	T	A	A	A	C	B1-Hap2	A	A	T	G	G	T	C	A	T	B2-Hap2

## Sheet: Table S10
Table S10. Two haplotypes of TaF-box-B1 and TaF-box-B2 in landraces and improved varieties
Number	Variety	species	Wheat region	Two alleles for TaF-box-B1	Two alleles for TaF-box-B2	Haplotypes
1	Baiguanglangtou	Landrace	Jiangsu	B1-Hap2	B2-Hap2	TaF-box-Hap2
2	Baihulutou	Landrace	Anhui	B1-Hap2	B2-Hap2	TaF-box-Hap2
3	Baikemai	Landrace	Fujian	B1-Hap2	B2-Hap2	TaF-box-Hap2
4	Baikezaomei	Landrace	Jiangsu	B1-Hap2	B2-Hap2	TaF-box-Hap2
5	Baipixiaomai	Landrace	Jiangsu	B1-Hap2	B2-Hap2	TaF-box-Hap2
6	Baichangshao	Landrace	Jiangsu	B1-Hap2	B2-Hap2	TaF-box-Hap2
7	Baijiaozi	Landrace	Jiangsu	B1-Hap2	B2-Hap2	TaF-box-Hap2
8	Beibeichikezhuomai	Landrace	Sichuan	B1-Hap2	B2-Hap2	TaF-box-Hap2
9	Caizihuang	Landrace	Jiangsu	B1-Hap2	B2-Hap2	TaF-box-Hap2
10	Chaoanxiaomai	Landrace	Guangdong	B1-Hap2	B2-Hap2	TaF-box-Hap2
11	Chejianzi	Landrace	Jiangsu	B1-Hap2	B2-Hap2	TaF-box-Hap2
12	Cuodaosiguatou	Landrace	Jiangsu	B1-Hap2	B2-Hap2	TaF-box-Hap2
13	Daguchui	Landrace	Jiangsu	B1-Hap2	B2-Hap2	TaF-box-Hap2
14	Dahongmai	Landrace	Gansu	B1-Hap1	B2-Hap1	TaF-box-Hap1
15	Dahongmai	Landrace	Jiangsu	B1-Hap2	B2-Hap2	TaF-box-Hap2
16	Dahongmang	Landrace	Jiangsu	B1-Hap2	B2-Hap2	TaF-box-Hap2
17	Dahongpao	Landrace	Jiangsu	B1-Hap2	B2-Hap2	TaF-box-Hap2
18	Dahuangpi	Landrace	Jiangsu	B1-Hap2	B2-Hap2	TaF-box-Hap2
19	Dayouzi	Landrace	Shandong	B1-Hap2	B2-Hap2	TaF-box-Hap2
20	Duanmai	Landrace	Gansu	B1-Hap2	B2-Hap2	TaF-box-Hap2
21	Fulingxuxumai	Landrace	Sichuan	B1-Hap2	B2-Hap2	TaF-box-Hap2
22	Guanyindumai	Landrace	Jiangsu	B1-Hap2	B2-Hap2	TaF-box-Hap2
23	Haiyanzhong	Landrace	Jiangsu	B1-Hap2	B2-Hap2	TaF-box-Hap2
24	Heshangtou	Landrace	Gansu	B1-Hap2	B2-Hap2	TaF-box-Hap2
25	Heshangtou	Landrace	Jiangsu	B1-Hap2	B2-Hap2	TaF-box-Hap2
26	Hongchunmai	Landrace	Gansu	B1-Hap2	B2-Hap2	TaF-box-Hap2
27	Hongkeaiqi	Landrace	Jiangsu	B1-Hap1	B2-Hap1	TaF-box-Hap1
28	Hongkemai	Landrace	Hunan	B1-Hap2	B2-Hap2	TaF-box-Hap2
29	Hongkeyangmai	Landrace	Jiangsu	B1-Hap2	B2-Hap2	TaF-box-Hap2
30	Hongmai	Landrace	Anhui	B1-Hap2	B2-Hap2	TaF-box-Hap2
31	Hongmangchun 21	Landrace	Nixia	B1-Hap2	B2-Hap2	TaF-box-Hap2
32	Hongmanghong	Landrace	Beijing	B1-Hap2	B2-Hap2	TaF-box-Hap2
33	Hongmangmai	Landrace	Gansu	B1-Hap2	B2-Hap2	TaF-box-Hap2
34	Hongmangmai	Landrace	Jiangsu	B1-Hap2	B2-Hap2	TaF-box-Hap2
35	Hongmangxiaomai	Landrace	Jiangsu	B1-Hap2	B2-Hap2	TaF-box-Hap2
36	Hongxiaomai	Landrace	Gansu	B1-Hap2	B2-Hap2	TaF-box-Hap2
37	Hongyouzi	Landrace	Henan	B1-Hap2	B2-Hap2	TaF-box-Hap2
38	Hongchangqi	Landrace	Jiangsu	B1-Hap2	B2-Hap2	TaF-box-Hap2
39	Hulutou	Landrace	Hebei	B1-Hap2	B2-Hap2	TaF-box-Hap2
40	Huangmangzi	Landrace	Jiangsu	B1-Hap2	B2-Hap2	TaF-box-Hap2
41	Huangxiandali	Landrace	Shandong	B1-Hap2	B2-Hap2	TaF-box-Hap2
42	Huoshaobairimai	Landrace	Jiangsu	B1-Hap1	B2-Hap1	TaF-box-Hap1
43	Jizitou	Landrace	Jiangsu	B1-Hap2	B2-Hap2	TaF-box-Hap2
44	Jiantoubai	Landrace	Beijing	B1-Hap2	B2-Hap2	TaF-box-Hap2
45	Jingyanxiaomai	Landrace	Sichuan	B1-Hap2	B2-Hap2	TaF-box-Hap2
46	Kangdingbendihuanghuamai	Landrace	Sichuan	B1-Hap2	B2-Hap2	TaF-box-Hap2
47	Langzhongbaimaizi	Landrace	Sichuan	B1-Hap2	B2-Hap2	TaF-box-Hap2
48	Liuzhutou	Landrace	Jiangsu	B1-Hap2	B2-Hap2	TaF-box-Hap2
49	Liuzhutouyangxiaomai	Landrace	Jiangsu	B1-Hap2	B2-Hap2	TaF-box-Hap2
50	Luxianbaimaizi（2）	Landrace	Sichuan	B1-Hap2	B2-Hap2	TaF-box-Hap2
51	Luxianwumanghonghuamai	Landrace	Sichuan	B1-Hap1	B2-Hap1	TaF-box-Hap1
52	Luziqing	Landrace	Jiangsu	B1-Hap2	B2-Hap2	TaF-box-Hap2
53	Luopangtou	Landrace	Jiangsu	B1-Hap2	B2-Hap2	TaF-box-Hap2
54	Maopu	Landrace	Jiangsu	B1-Hap2	B2-Hap2	TaF-box-Hap2
55	Maotoumai	Landrace	Jiangsu	B1-Hap2	B2-Hap2	TaF-box-Hap2
56	Maotouzi	Landrace	Jiangsu	B1-Hap2	B2-Hap2	TaF-box-Hap2
57	Meiqianwu	Landrace	Jiangsu	B1-Hap2	B2-Hap2	TaF-box-Hap2
58	Muchuanbendiguangtouxiaomai	Landrace	Sichuan	B1-Hap2	B2-Hap2	TaF-box-Hap2
59	Nanchongdaguangtouxiaomai	Landrace	Sichuan	B1-Hap2	B2-Hap2	TaF-box-Hap2
60	Pengansanyuehuang	Landrace	Sichuan	B1-Hap2	B2-Hap2	TaF-box-Hap2
61	Pilong 2	Landrace	Jiangsu	B1-Hap2	B2-Hap2	TaF-box-Hap2
62	Qianjiaomai	Landrace	America	B1-Hap2	B2-Hap2	TaF-box-Hap2
63	Qinglanmai	Landrace	Gansu	B1-Hap2	B2-Hap2	TaF-box-Hap2
64	Quetuimai	Landrace	Jiangsu	B1-Hap2	B2-Hap2	TaF-box-Hap2
65	Shehongdayu	Landrace	Sichuan	B1-Hap2	B2-Hap2	TaF-box-Hap2
66	Sichuanyonggang 2	Landrace	Sichuan	B1-Hap1	B2-Hap1	TaF-box-Hap1
67	Sichuanyuangudahonghua (1)	Landrace	Sichuan	B1-Hap2	B2-Hap2	TaF-box-Hap2
68	Sichuanyuangudahonghua (2)	Landrace	Sichuan	B1-Hap2	B2-Hap2	TaF-box-Hap2
69	Sichuanchangxuxuyoutiao	Landrace	Sichuan	B1-Hap2	B2-Hap2	TaF-box-Hap2
70	Sumai	Landrace	Gansu	B1-Hap2	B2-Hap2	TaF-box-Hap2
71	Suiningtuotuomai	Landrace	Sichuan	B1-Hap2	B2-Hap2	TaF-box-Hap2
72	Tiandengxiaomai	Landrace	Guangxi	B1-Hap2	B2-Hap2	TaF-box-Hap2
73	Tiebaomai	Landrace	Gansu	B1-Hap1	B2-Hap1	TaF-box-Hap1
74	Tongjianghongmai	Landrace	Sichuan	B1-Hap2	B2-Hap2	TaF-box-Hap2
75	Waitouzi	Landrace	Sichuan	B1-Hap2	B2-Hap2	TaF-box-Hap2
76	Wanxianbaimaizi	Landrace	Sichuan	B1-Hap2	B2-Hap2	TaF-box-Hap2
77	Wangshuibai	Landrace	Sichuan	B1-Hap2	B2-Hap2	TaF-box-Hap2
78	Wushanxiaomai	Landrace	Sichuan	B1-Hap2	B2-Hap2	TaF-box-Hap2
79	Wuhuatou	Landrace	Hebei	B1-Hap2	B2-Hap2	TaF-box-Hap2
80	Xiziximai	Landrace	Jiangsu	B1-Hap2	B2-Hap2	TaF-box-Hap2
81	Xiaoguangtou	Landrace	Jiangsu	B1-Hap2	B2-Hap2	TaF-box-Hap2
82	Xiaohongmai	Landrace	Gansu	B1-Hap2	B2-Hap2	TaF-box-Hap2
83	Xiaohongmang	Landrace	Beijing	B1-Hap2	B2-Hap2	TaF-box-Hap2
84	Xiaoyuhua	Landrace	Jiangsu	B1-Hap2	B2-Hap2	TaF-box-Hap2
85	Xueliqing	Landrace	Jiangsu	B1-Hap2	B2-Hap2	TaF-box-Hap2
86	Yashezi	Landrace	Jiangsu	B1-Hap2	B2-Hap2	TaF-box-Hap2
87	Yazuixiaomai	Landrace	Jiangsu	B1-Hap2	B2-Hap2	TaF-box-Hap2
88	Yazuizi	Landrace	Jiangsu	B1-Hap2	B2-Hap2	TaF-box-Hap2
89	Yanbianqingkemai	Landrace	Sichuan	B1-Hap2	B2-Hap2	TaF-box-Hap2
90	Yangxiaomai	Landrace	Jiangsu	B1-Hap2	B2-Hap2	TaF-box-Hap2
91	Yishanxiaomai	Landrace	Guangxi	B1-Hap2	B2-Hap2	TaF-box-Hap2
92	Yingshansanyuehuang	Landrace	Sichuan	B1-Hap2	B2-Hap2	TaF-box-Hap2
93	Yingshanghong	Landrace	Anhui	B1-Hap2	B2-Hap2	TaF-box-Hap2
94	Youmai	Landrace	Guangxi	B1-Hap2	B2-Hap2	TaF-box-Hap2
95	Youbao	Landrace	Shandong	B1-Hap2	B2-Hap2	TaF-box-Hap2
96	Youmangchangsifang	Landrace	Jiangsu	B1-Hap2	B2-Hap2	TaF-box-Hap2
97	Yuguo	Landrace	Japan	B1-Hap2	B2-Hap2	TaF-box-Hap2
98	Zaoshitain	Landrace	Jiangsu	B1-Hap2	B2-Hap2	TaF-box-Hap2
99	Zaoxiaomai	Landrace	Jiangsu	B1-Hap2	B2-Hap2	TaF-box-Hap2
100	Zhangmingyuweilanmai	Landrace	Sichuan	B1-Hap2	B2-Hap2	TaF-box-Hap2
101	Changganchejianzi	Landrace	Jiangsu	B1-Hap2	B2-Hap2	TaF-box-Hap2
102	Changmangmang	Landrace	Gansu	B1-Hap2	B2-Hap2	TaF-box-Hap2
103	Changqibaike	Landrace	Jiangsu	B1-Hap2	B2-Hap2	TaF-box-Hap2
104	Zhangsihuang	Landrace	Jiangsu	B1-Hap1	B2-Hap1	TaF-box-Hap1
105	Zhongjiangchangmangbaixiaomai	Landrace	Sichuan	B1-Hap2	B2-Hap2	TaF-box-Hap2
106	Zitongnuermai	Landrace	Sichuan	B1-Hap2	B2-Hap2	TaF-box-Hap2
107	Zipisiguatou	Landrace	Jiangsu	B1-Hap2	B2-Hap2	TaF-box-Hap2
108	Zuantoubaike	Landrace	Jiangsu	B1-Hap2	B2-Hap2	TaF-box-Hap2
109	Yangmai 158	Cultivated	YRWW	B1-Hap1	B2-Hap1	TaF-box-Hap1
110	Yannong 15	Cultivated	HWW	N	N	N
111	Annong 9267	Cultivated	YRWW	B1-Hap2	B2-Hap2	TaF-box-Hap2
112	Annong 92484W	Cultivated	YRWW	B1-Hap2	B2-Hap2	TaF-box-Hap2
113	Wanmai 38	Cultivated	HWW	B1-Hap2	B2-Hap2	TaF-box-Hap2
114	Aizao 64	Cultivated	YRWW	B1-Hap1	B2-Hap1	TaF-box-Hap1
115	Zheng 9023	Cultivated	HWW	B1-Hap1	B2-Hap1	TaF-box-Hap1
116	Bainong 64	Cultivated	HWW	B1-Hap2	B2-Hap2	TaF-box-Hap2
117	Xiaoyan 6	Cultivated	HWW	B1-Hap2	B2-Hap2	TaF-box-Hap2
118	Glenlen	Cultivated	YRWW	B1-Hap1	B2-Hap1	TaF-box-Hap1
119	Zhoumai 16	Cultivated	HWW	B1-Hap2	B2-Hap2	TaF-box-Hap2
120	02P67	Cultivated	YRWW	B1-Hap2	B2-Hap2	TaF-box-Hap2
121	02Y151	Cultivated	YRWW	B1-Hap1	B2-Hap1	TaF-box-Hap1
122	Handan 6172	Cultivated	HWW	B1-Hap1	B2-Hap1	TaF-box-Hap1
123	Aikang 58	Cultivated	HWW	B1-Hap2	B2-Hap2	TaF-box-Hap2
124	Zhoumai 18	Cultivated	HWW	B1-Hap2	B2-Hap2	TaF-box-Hap2
125	Lian 9791	Cultivated	HWW	B1-Hap2	B2-Hap2	TaF-box-Hap2
126	Shengxuan 3	Cultivated	YRWW	N	B2-Hap1	N
127	Y14	Cultivated	YRWW	B1-Hap1	B2-Hap1	TaF-box-Hap1
128	Y18	Cultivated	YRWW	B1-Hap2	B2-Hap2	TaF-box-Hap2
129	E158	Cultivated	YRWW	B1-Hap1	B2-Hap1	TaF-box-Hap1
130	Xinmai 9408	Cultivated	HWW	B1-Hap1	B2-Hap1	TaF-box-Hap1
131	Zhengmai 3666	Cultivated	HWW	B1-Hap2	B2-Hap2	TaF-box-Hap2
132	DH6197	Cultivated	YRWW	B1-Hap2	B2-Hap2	TaF-box-Hap2
133	Shannong 785	Cultivated	HWW	B1-Hap2	B2-Hap2	TaF-box-Hap2
134	Huaimai 0226	Cultivated	HWW	N	B2-Hap2	N
135	Huaimai 0209	Cultivated	HWW	B1-Hap2	B2-Hap2	TaF-box-Hap2
136	03G7	Cultivated	HWW	B1-Hap2	B2-Hap2	TaF-box-Hap2
137	Shi B03-5672	Cultivated	HWW	B1-Hap2	B2-Hap2	TaF-box-Hap2
138	X9610	Cultivated	YRWW	B1-Hap2	B2-Hap2	TaF-box-Hap2
139	Xumai 270	Cultivated	HWW	B1-Hap2	B2-Hap2	TaF-box-Hap2
140	Huaimai 0802	Cultivated	HWW	B1-Hap2	B2-Hap2	TaF-box-Hap2
141	Huaimai 0360	Cultivated	HWW	B1-Hap2	B2-Hap2	TaF-box-Hap2
142	Zhou 98165	Cultivated	HWW	B1-Hap2	B2-Hap2	TaF-box-Hap2
143	Xinmai 18	Cultivated	HWW	B1-Hap2	B2-Hap2	TaF-box-Hap2
144	Xinong 889	Cultivated	HWW	B1-Hap1	B2-Hap1	TaF-box-Hap1
145	Huaihe 0308	Cultivated	HWW	B1-Hap2	B2-Hap2	TaF-box-Hap2
146	Feihua 8829	Cultivated	HWW	B1-Hap1	B2-Hap1	TaF-box-Hap1
147	Neixiang 203	Cultivated	HWW	B1-Hap1	B2-Hap1	TaF-box-Hap1
148	Huaimai 0320	Cultivated	HWW	B1-Hap1	B2-Hap1	TaF-box-Hap1
149	Xinmai 19023	Cultivated	HWW	B1-Hap2	B2-Hap2	TaF-box-Hap2
150	Nick	Cultivated	YRWW	B1-Hap2	B2-Hap2	TaF-box-Hap2
151	Chuanmai 42 (white)	Cultivated	SWW	B1-Hap2	B2-Hap2	TaF-box-Hap2
152	Chuanmai 42 (red)	Cultivated	SWW	B1-Hap1	B2-Hap1	TaF-box-Hap1
153	Jinan 17	Cultivated	HWW	B1-Hap2	B2-Hap2	TaF-box-Hap2
154	Jimai 19	Cultivated	HWW	B1-Hap2	B2-Hap2	TaF-box-Hap2
155	Jimai 20	Cultivated	HWW	B1-Hap1	B2-Hap1	TaF-box-Hap1
156	Jimai 21	Cultivated	HWW	B1-Hap2	B2-Hap2	TaF-box-Hap2
157	jimai 22	Cultivated	HWW	B1-Hap1	B2-Hap1	TaF-box-Hap1
158	876	Cultivated	YRWW	B1-Hap1	B2-Hap1	TaF-box-Hap1
159	ENESCO	Cultivated	HWW	B1-Hap2	B2-Hap2	TaF-box-Hap2
160	FARO	Cultivated	YRWW	B1-Hap2	B2-Hap2	TaF-box-Hap2
161	TupatecoR	Cultivated	YRWW	B1-Hap2	B2-Hap2	TaF-box-Hap2
162	Mianmai 39	Cultivated	SWW	B1-Hap1	B2-Hap1	TaF-box-Hap1
163	Shijiazhuang 8	Cultivated	HWW	B1-Hap1	B2-Hap1	TaF-box-Hap1
164	Shijiazhung 15	Cultivated	HWW	B1-Hap2	B2-Hap2	TaF-box-Hap2
165	Lankao 298	Cultivated	HWW	B1-Hap2	B2-Hap2	TaF-box-Hap2
166	Ligao 6	Cultivated	HWW	B1-Hap1	B2-Hap1	TaF-box-Hap1
167	Fanmai 5	Cultivated	HWW	B1-Hap1	B2-Hap1	TaF-box-Hap1
168	Kaimai 18	Cultivated	HWW	B1-Hap1	B2-Hap1	TaF-box-Hap1
169	Annong 0807	Cultivated	YRWW	B1-Hap2	B2-Hap2	TaF-box-Hap2
170	Annong 0822	Cultivated	YRWW	B1-Hap1	B2-Hap1	TaF-box-Hap1
171	Tai 10604	Cultivated	NWW	B1-Hap2	B2-Hap2	TaF-box-Hap2
172	Niavt14	Cultivated	NWW	B1-Hap2	B2-Hap2	TaF-box-Hap2
173	Jinhe 9123	Cultivated	HWW	B1-Hap1	B2-Hap1	TaF-box-Hap1
174	Guinong 775	Cultivated	SWW	B1-Hap2	B2-Hap2	TaF-box-Hap2
175	AR2	Cultivated	YRWW	B1-Hap2	B2-Hap2	TaF-box-Hap2
176	03-885	Cultivated	YRWW	B1-Hap2	B2-Hap2	TaF-box-Hap2
177	02-192	Cultivated	YRWW	B1-Hap1	B2-Hap1	TaF-box-Hap1
178	ARZ	Cultivated	HWW	B1-Hap2	B2-Hap2	TaF-box-Hap2
179	R146	Cultivated	YRWW	B1-Hap1	B2-Hap1	TaF-box-Hap1
180	Yi 00-119	Cultivated	YRWW	B1-Hap1	B2-Hap1	TaF-box-Hap1
181	Jinmai 73	Cultivated	NWW	B1-Hap2	B2-Hap2	TaF-box-Hap2
182	Chuanmai 42	Cultivated	SWW	B1-Hap1	B2-Hap1	TaF-box-Hap1
183	Mianmai 37	Cultivated	SWW	B1-Hap2	B2-Hap2	TaF-box-Hap2
184	Gaoyou 2018	Cultivated	HWW	B1-Hap2	B2-Hap2	TaF-box-Hap2
185	CP01-27-3-1-1	Cultivated	HWW	B1-Hap1	B2-Hap1	TaF-box-Hap1
186	CP02-63-13-1	Cultivated	HWW	B1-Hap2	B2-Hap2	TaF-box-Hap2
187	CP01-39-17-1	Cultivated	HWW	B1-Hap1	B2-Hap1	TaF-box-Hap1
188	CP02-8-5-6-1	Cultivated	HWW	B1-Hap1	B2-Hap1	TaF-box-Hap1
189	CP02-9-3-1-1-1	Cultivated	HWW	B1-Hap2	B2-Hap2	TaF-box-Hap2
190	CP01-39-3-2-4	Cultivated	HWW	B1-Hap2	B2-Hap2	TaF-box-Hap2
191	CP20-39-11-1	Cultivated	HWW	B1-Hap2	B2-Hap2	TaF-box-Hap2
192	CP02-8-5-6-2F1	Cultivated	HWW	B1-Hap2	B2-Hap2	TaF-box-Hap2
193	Shimai 12	Cultivated	HWW	B1-Hap2	B2-Hap2	TaF-box-Hap2
194	Shimai 18	Cultivated	HWW	B1-Hap2	B2-Hap2	TaF-box-Hap2
195	Shiyou 17	Cultivated	HWW	B1-Hap2	B2-Hap2	TaF-box-Hap2
196	Jishi 02-1	Cultivated	HWW	B1-Hap2	B2-Hap2	TaF-box-Hap2
197	Ji 5265	Cultivated	HWW	B1-Hap1	B2-Hap1	TaF-box-Hap1
198	Bainongaikang 58	Cultivated	HWW	B1-Hap2	B2-Hap2	TaF-box-Hap2
199	Annong 1003	Cultivated	YRWW	B1-Hap2	B2-Hap2	TaF-box-Hap2
200	Annong 1004	Cultivated	YRWW	B1-Hap2	B2-Hap2	TaF-box-Hap2
201	Annong 1005	Cultivated	YRWW	B1-Hap2	B2-Hap2	TaF-box-Hap2
202	Annong 1006	Cultivated	YRWW	B1-Hap2	B2-Hap2	TaF-box-Hap2
203	Annong 1007	Cultivated	YRWW	B1-Hap2	B2-Hap2	TaF-box-Hap2
204	Annong 1008	Cultivated	YRWW	B1-Hap1	B2-Hap1	TaF-box-Hap1
205	Annong 1014	Cultivated	YRWW	B1-Hap1	B2-Hap1	TaF-box-Hap1
206	Annong 1016	Cultivated	YRWW	B1-Hap1	B2-Hap1	TaF-box-Hap1
207	Annong 1020	Cultivated	YRWW	B1-Hap2	B2-Hap2	TaF-box-Hap2
208	Annong 1025	Cultivated	YRWW	B1-Hap2	B2-Hap2	TaF-box-Hap2
209	Annong 1026	Cultivated	YRWW	B1-Hap1	B2-Hap1	TaF-box-Hap1
210	Annong 1027	Cultivated	YRWW	B1-Hap2	B2-Hap2	TaF-box-Hap2
211	Liangxing 66	Cultivated	HWW	B1-Hap2	B2-Hap2	TaF-box-Hap2
212	Annong 8455	Cultivated	YRWW	B1-Hap2	B2-Hap2	TaF-box-Hap2
213	Liangxing 99	Cultivated	HWW	B1-Hap2	B2-Hap2	TaF-box-Hap2
214	Shannong 05-066	Cultivated	HWW	B1-Hap2	B2-Hap2	TaF-box-Hap2
215	9987	Cultivated	YRWW	B1-Hap1	B2-Hap1	TaF-box-Hap1
216	Xuke 1	Cultivated	HWW	B1-Hap2	B2-Hap2	TaF-box-Hap2
217	984121	Cultivated	HWW	B1-Hap2	B2-Hap2	TaF-box-Hap2
218	Henong 825	Cultivated	NWW	B1-Hap1	B2-Hap1	TaF-box-Hap1
219	Zhengmai 883	Cultivated	HWW	B1-Hap2	B2-Hap2	TaF-box-Hap2
220	Zhoumai 24	Cultivated	HWW	N	B2-Hap2	N
221	Zhoumai 25	Cultivated	HWW	B1-Hap1	B2-Hap1	TaF-box-Hap1
222	Huacheng 699	Cultivated	HWW	B1-Hap1	B2-Hap1	TaF-box-Hap1
223	Zi 0706	Cultivated	HWW	B1-Hap1	B2-Hap1	TaF-box-Hap1
224	Wannong 606	Cultivated	YRWW	B1-Hap2	B2-Hap2	TaF-box-Hap2
225	Longke 0901	Cultivated	HWW	B1-Hap2	B2-Hap2	TaF-box-Hap2
226	Aifengzao 8	Cultivated	HWW	B1-Hap1	B2-Hap1	TaF-box-Hap1
227	Su 853	Cultivated	HWW	B1-Hap2	B2-Hap2	TaF-box-Hap2
228	Hongwan 3	Cultivated	YRWW	B1-Hap2	B2-Hap2	TaF-box-Hap2
229	Wanke 08585	Cultivated	YRWW	B1-Hap1	B2-Hap1	TaF-box-Hap1
230	Wankeimai 081	Cultivated	YRWW	B1-Hap1	B2-Hap1	TaF-box-Hap1
231	Dangmai 2	Cultivated	YRWW	B1-Hap2	B2-Hap2	TaF-box-Hap2
232	Ningqing 185	Cultivated	YRWW	B1-Hap2	B2-Hap2	TaF-box-Hap2
233	Huinong 98	Cultivated	HWW	B1-Hap2	B2-Hap2	TaF-box-Hap2
234	Dinghong 208	Cultivated	YRWW	B1-Hap1	B2-Hap1	TaF-box-Hap1
235	Ning 0717	Cultivated	YRWW	N	N	N
236	Bainong 898	Cultivated	HWW	B1-Hap1	B2-Hap1	TaF-box-Hap1
237	Bainong 3271	Cultivated	HWW	B1-Hap1	B2-Hap1	TaF-box-Hap1
238	R77/6	Cultivated	YRWW	B1-Hap1	B2-Hap1	TaF-box-Hap1
239	Yangmai 16	Cultivated	YRWW	B1-Hap1	B2-Hap1	TaF-box-Hap1
240	Annong 0928	Cultivated	YRWW	B1-Hap2	B2-Hap2	TaF-box-Hap2
241	Annong 0932	Cultivated	YRWW	B1-Hap2	B2-Hap2	TaF-box-Hap2
242	Annong 0942	Cultivated	YRWW	B1-Hap1	B2-Hap1	TaF-box-Hap1
243	Annong	Cultivated	YRWW	B1-Hap1	B2-Hap1	TaF-box-Hap1
244	Annong 1001	Cultivated	YRWW	B1-Hap1	B2-Hap1	TaF-box-Hap1
245	Tai 18	Cultivated	HWW	B1-Hap1	B2-Hap1	TaF-box-Hap1
246	Yunong 69	Cultivated	HWW	B1-Hap2	B2-Hap2	TaF-box-Hap2
247	Zhongmai 1195	Cultivated	NWW	B1-Hap2	B2-Hap2	TaF-box-Hap2
248	Zhongmai 1187	Cultivated	NWW	N	N	N
249	Zhongmai 1143	Cultivated	NWW	B1-Hap1	B2-Hap1	TaF-box-Hap1
250	Zhongmai 1142	Cultivated	NWW	B1-Hap2	B2-Hap2	TaF-box-Hap2
251	Zhongmai 1140	Cultivated	NWW	B1-Hap2	B2-Hap2	TaF-box-Hap2
252	Zhongmai 1196	Cultivated	NWW	B1-Hap2	B2-Hap2	TaF-box-Hap2
253	Zhongyu 1023	Cultivated	HWW	B1-Hap2	B2-Hap2	TaF-box-Hap2
254	Zhongyu 1026	Cultivated	HWW	B1-Hap2	B2-Hap2	TaF-box-Hap2
255	Zhongyu 1095	Cultivated	HWW	B1-Hap1	B2-Hap1	TaF-box-Hap1
256	Luo 6099	Cultivated	HWW	B1-Hap2	B2-Hap2	TaF-box-Hap2
257	Luo 678	Cultivated	HWW	B1-Hap2	B2-Hap2	TaF-box-Hap2
258	Luo 6135	Cultivated	HWW	B1-Hap1	B2-Hap1	TaF-box-Hap1
259	Xinmai 23	Cultivated	HWW	B1-Hap1	B2-Hap1	TaF-box-Hap1
260	Zhongzhi 1	Cultivated	HWW	N	B2-Hap2	N
261	Xinmai 0208	Cultivated	HWW	B1-Hap2	B2-Hap2	TaF-box-Hap2
262	Xinmai 2119	Cultivated	HWW	B1-Hap1	B2-Hap1	TaF-box-Hap1
263	Xinmai 19	Cultivated	HWW	B1-Hap2	B2-Hap2	TaF-box-Hap2
264	Linyou 8159	Cultivated	NWW	B1-Hap2	B2-Hap2	TaF-box-Hap2
265	Yangmai 20	Cultivated	YRWW	B1-Hap1	B2-Hap1	TaF-box-Hap1
266	Yangmai 19	Cultivated	YRWW	B1-Hap1	B2-Hap1	TaF-box-Hap1
267	Tikong 6	Cultivated	HWW	B1-Hap2	B2-Hap2	TaF-box-Hap2
268	Yangruomai 1	Cultivated	YRWW	B1-Hap1	B2-Hap1	TaF-box-Hap1
269	Xingmai 6	Cultivated	HWW	B1-Hap2	B2-Hap2	TaF-box-Hap2
270	Xingmai 13	Cultivated	HWW	B1-Hap2	B2-Hap2	TaF-box-Hap2
271	Yumai 9	Cultivated	SWW	B1-Hap1	B2-Hap1	TaF-box-Hap1
272	Yumai 7	Cultivated	SWW	B1-Hap2	B2-Hap2	TaF-box-Hap2
273	Yu 0926	Cultivated	SWW	B1-Hap1	B2-Hap1	TaF-box-Hap1
274	Yu 09113	Cultivated	SWW	B1-Hap1	B2-Hap1	TaF-box-Hap1
275	Neimai 8	Cultivated	SWW	B1-Hap2	B2-Hap2	TaF-box-Hap2
276	Neimai 9	Cultivated	SWW	B1-Hap2	B2-Hap2	TaF-box-Hap2
277	Neimai 10	Cultivated	SWW	B1-Hap2	B2-Hap2	TaF-box-Hap2
278	Zhongzhi 9	Cultivated	HWW	B1-Hap2	B2-Hap2	TaF-box-Hap2
279	Neimai 836	Cultivated	SWW	B1-Hap1	B2-Hap1	TaF-box-Hap1
280	Qianmai 18	Cultivated	SWW	B1-Hap2	B2-Hap2	TaF-box-Hap2
281	Qiqn 102032-8	Cultivated	SWW	B1-Hap2	B2-Hap2	TaF-box-Hap2
282	Qian 079939-5	Cultivated	SWW	B1-Hap2	B2-Hap2	TaF-box-Hap2
283	Qian 079984-14	Cultivated	SWW	B1-Hap2	B2-Hap2	TaF-box-Hap2
284	Changhe 25	Cultivated	HWW	B1-Hap2	B2-Hap2	TaF-box-Hap2
285	Wanke 06290	Cultivated	YRWW	B1-Hap2	B2-Hap2	TaF-box-Hap2
286	Wanke 700	Cultivated	YRWW	B1-Hap1	B2-Hap1	TaF-box-Hap1
287	Xiannong 1	Cultivated	HWW	B1-Hap2	B2-Hap2	TaF-box-Hap2
288	Danshi 802	Cultivated	HWW	B1-Hap1	B2-Hap1	TaF-box-Hap1
289	Zhongmai 1139	Cultivated	NWW	B1-Hap2	N	N
290	Huahui 1088	Cultivated	HWW	B1-Hap2	B2-Hap2	TaF-box-Hap2
291	Huaihe 0615	Cultivated	HWW	B1-Hap2	B2-Hap2	TaF-box-Hap2
292	Junmai 35	Cultivated	HWW	B1-Hap2	B2-Hap2	TaF-box-Hap2
293	Mingtian 0417	Cultivated	HWW	B1-Hap2	B2-Hap2	TaF-box-Hap2
294	Guomai 0608	Cultivated	HWW	B1-Hap2	B2-Hap2	TaF-box-Hap2
295	Zhongfan 5	Cultivated	HWW	B1-Hap2	B2-Hap2	TaF-box-Hap2
296	Mingtian 07112	Cultivated	HWW	N	B2-Hap2	N
297	Guomai 8	Cultivated	HWW	B1-Hap2	B2-Hap2	TaF-box-Hap2
298	Yanzhan 4110	Cultivated	HWW	B1-Hap1	B2-Hap1	TaF-box-Hap1
299	Zhongfan 4	Cultivated	HWW	B1-Hap2	N	N
300	Xinong 622	Cultivated	HWW	B1-Hap1	B2-Hap1	TaF-box-Hap1
301	Huapei 8	Cultivated	HWW	B1-Hap2	B2-Hap2	TaF-box-Hap2
302	Luo 9920	Cultivated	HWW	B1-Hap2	B2-Hap2	TaF-box-Hap2
303	Fengdecunmai 5	Cultivated	HWW	B1-Hap2	B2-Hap2	TaF-box-Hap2
304	Guanmai 1	Cultivated	HWW	B1-Hap2	B2-Hap2	TaF-box-Hap2
305	Guomai 10	Cultivated	HWW	B1-Hap2	B2-Hap2	TaF-box-Hap2
306	Jinline88	Cultivated	HWW	B1-Hap2	B2-Hap2	TaF-box-Hap2
307	Luomai 05159	Cultivated	HWW	B1-Hap2	B2-Hap2	TaF-box-Hap2
308	Luo 6073	Cultivated	HWW	B1-Hap1	B2-Hap1	TaF-box-Hap1
309	Xinmai 0401	Cultivated	HWW	B1-Hap1	B2-Hap1	TaF-box-Hap1
310	Zhengyumai 518	Cultivated	HWW	N	B2-Hap2	N
311	Zhongyou 989	Cultivated	HWW	B1-Hap2	B2-Hap2	TaF-box-Hap2
312	Baofeng 10-82	Cultivated	HWW	B1-Hap2	B2-Hap2	TaF-box-Hap2
313	Huaimai 0882	Cultivated	HWW	B1-Hap2	B2-Hap2	TaF-box-Hap2
314	Xumai 9074	Cultivated	HWW	B1-Hap2	B2-Hap2	TaF-box-Hap2
315	Luyuan 502	Cultivated	HWW	B1-Hap2	B2-Hap2	TaF-box-Hap2
316	Luo 2267	Cultivated	HWW	B1-Hap1	B2-Hap1	TaF-box-Hap1
317	Zhongyuan 18	Cultivated	HWW	B1-Hap2	B2-Hap2	TaF-box-Hap2
318	Zhoumai 31	Cultivated	HWW	B1-Hap1	B2-Hap1	TaF-box-Hap1
319	Huarui 0712	Cultivated	HWW	B1-Hap2	B2-Hap2	TaF-box-Hap2
320	Huaishi 0808	Cultivated	HWW	B1-Hap1	B2-Hap1	TaF-box-Hap1
321	Guoshengmai 1	Cultivated	HWW	B1-Hap2	B2-Hap2	TaF-box-Hap2
322	Wanke 09636	Cultivated	YRWW	B1-Hap1	B2-Hap1	TaF-box-Hap1
323	Guomai 10	Cultivated	HWW	B1-Hap2	B2-Hap2	TaF-box-Hap2
324	Shannong 055843	Cultivated	HWW	B1-Hap2	B2-Hap2	TaF-box-Hap2
325	Fu 0382	Cultivated	HWW	B1-Hap2	B2-Hap2	TaF-box-Hap2
326	Huacheng 702	Cultivated	HWW	B1-Hap2	B2-Hap2	TaF-box-Hap2
327	Haolunxuan 182	Cultivated	HWW	B1-Hap2	B2-Hap2	TaF-box-Hap2
328	Bofeng 09-82	Cultivated	HWW	B1-Hap2	B2-Hap2	TaF-box-Hap2
329	TQ0908	Cultivated	HWW	B1-Hap1	B2-Hap1	TaF-box-Hap1
330	Huaishi 0806	Cultivated	HWW	B1-Hap1	B2-Hap1	TaF-box-Hap1
331	Xinyuanmai 04130	Cultivated	HWW	B1-Hap1	B2-Hap1	TaF-box-Hap1
332	Jianmai 206	Cultivated	HWW	B1-Hap2	B2-Hap2	TaF-box-Hap2
333	Lemai 091156	Cultivated	HWW	B1-Hap1	B2-Hap1	TaF-box-Hap1
334	Wannong 07213	Cultivated	HWW	B1-Hap2	B2-Hap2	TaF-box-Hap2
335	Annong 1034	Cultivated	YRWW	B1-Hap1	B2-Hap1	TaF-box-Hap1
336	Annong 1101	Cultivated	YRWW	B1-Hap2	B2-Hap2	TaF-box-Hap2
337	Annong 1102	Cultivated	YRWW	B1-Hap1	B2-Hap1	TaF-box-Hap1
338	Annong 1103	Cultivated	YRWW	B1-Hap1	B2-Hap1	TaF-box-Hap1
339	Annong 1104	Cultivated	YRWW	B1-Hap2	B2-Hap2	TaF-box-Hap2
340	Annong 1105	Cultivated	YRWW	B1-Hap2	B2-Hap2	TaF-box-Hap2
341	Annong 1106	Cultivated	YRWW	B1-Hap2	B2-Hap2	TaF-box-Hap2
342	Annong 1107	Cultivated	YRWW	B1-Hap2	B2-Hap2	TaF-box-Hap2
343	Annong 1108	Cultivated	YRWW	B1-Hap1	B2-Hap1	TaF-box-Hap1
344	Annong 1109	Cultivated	YRWW	B1-Hap2	B2-Hap2	TaF-box-Hap2
345	Annong 1110	Cultivated	YRWW	N	B2-Hap1	N
346	Annong 1111	Cultivated	YRWW	B1-Hap1	B2-Hap1	TaF-box-Hap1
347	Zhengyumai 518	Cultivated	HWW	N	B2-Hap2	N
348	Annong 1113	Cultivated	YRWW	B1-Hap2	B2-Hap2	TaF-box-Hap2
349	Annong 1114	Cultivated	YRWW	B1-Hap2	B2-Hap2	TaF-box-Hap2
350	Annong 1115	Cultivated	YRWW	B1-Hap2	B2-Hap2	TaF-box-Hap2
351	Annong 1116	Cultivated	YRWW	B1-Hap1	B2-Hap1	TaF-box-Hap1
352	Annong 1117	Cultivated	YRWW	B1-Hap1	B2-Hap1	TaF-box-Hap1
353	Annong 1118	Cultivated	YRWW	B1-Hap1	B2-Hap1	TaF-box-Hap1
354	Annong 1119	Cultivated	YRWW	B1-Hap1	B2-Hap1	TaF-box-Hap1
355	Annong 1120	Cultivated	YRWW	B1-Hap1	B2-Hap1	TaF-box-Hap1
356	Annong 1121	Cultivated	YRWW	B1-Hap1	B2-Hap1	TaF-box-Hap1
357	Annong 1122	Cultivated	YRWW	B1-Hap1	B2-Hap1	TaF-box-Hap1
358	Annong 1123	Cultivated	YRWW	B1-Hap1	B2-Hap1	TaF-box-Hap1
359	Annong 1124	Cultivated	YRWW	B1-Hap1	B2-Hap1	TaF-box-Hap1
360	Annong 1125	Cultivated	YRWW	B1-Hap1	B2-Hap1	TaF-box-Hap1
361	Annong 1126	Cultivated	YRWW	B1-Hap1	B2-Hap1	TaF-box-Hap1
362	Annong 1127	Cultivated	YRWW	B1-Hap1	B2-Hap1	TaF-box-Hap1
363	Annong 1128	Cultivated	YRWW	B1-Hap2	B2-Hap2	TaF-box-Hap2
364	Annong 1129	Cultivated	YRWW	B1-Hap1	B2-Hap1	TaF-box-Hap1
365	Annong 1130	Cultivated	YRWW	B1-Hap1	B2-Hap1	TaF-box-Hap1
366	Annong 1131	Cultivated	YRWW	B1-Hap1	B2-Hap1	TaF-box-Hap1
367	Lunxuan 988	Cultivated	HWW	B1-Hap2	B2-Hap2	TaF-box-Hap2
368	Bainong 207	Cultivated	HWW	B1-Hap2	B2-Hap2	TaF-box-Hap2
369	Annong 1039	Cultivated	YRWW	B1-Hap1	B2-Hap1	TaF-box-Hap1
370	Fanmai 8	Cultivated	HWW	B1-Hap1	B2-Hap1	TaF-box-Hap1
371	Zhongmai 895	Cultivated	HWW	B1-Hap2	B2-Hap2	TaF-box-Hap2
372	Zhoumai 27	Cultivated	HWW	B1-Hap2	B2-Hap2	TaF-box-Hap2
373	An 0817	Cultivated	HWW	B1-Hap2	B2-Hap2	TaF-box-Hap2
374	Huaimai 05155	Cultivated	HWW	B1-Hap2	B2-Hap2	TaF-box-Hap2
375	Luo 3429	Cultivated	HWW	B1-Hap2	B2-Hap2	TaF-box-Hap2
376	Tianmin 198	Cultivated	HWW	B1-Hap1	B2-Hap1	TaF-box-Hap1
377	Annong 0942-13	Cultivated	YRWW	B1-Hap1	B2-Hap1	TaF-box-Hap1
378	Hengguan 35	Cultivated	HWW	B1-Hap2	B2-Hap2	TaF-box-Hap2
379	Su 553	Cultivated	HWW	B1-Hap2	B2-Hap2	TaF-box-Hap2
380	Yannong 21	Cultivated	HWW	B1-Hap2	B2-Hap2	TaF-box-Hap2
381	Yannong 22	Cultivated	HWW	B1-Hap2	B2-Hap2	TaF-box-Hap2
382	Yannong 23	Cultivated	HWW	B1-Hap2	B2-Hap2	TaF-box-Hap2
383	Yannong 24	Cultivated	HWW	B1-Hap2	B2-Hap2	TaF-box-Hap2
384	Yan 0428	Cultivated	HWW	B1-Hap2	B2-Hap2	TaF-box-Hap2
385	Yan 2415	Cultivated	HWW	B1-Hap2	B2-Hap2	TaF-box-Hap2
386	Yannong 999	Cultivated	HWW	B1-Hap2	B2-Hap2	TaF-box-Hap2
387	Long 10135	Cultivated	YRWW	B1-Hap2	B2-Hap2	TaF-box-Hap2
388	Zhongmai 14	Cultivated	NWW	B1-Hap2	B2-Hap2	TaF-box-Hap2
389	RL6077	Cultivated	YRWW	B1-Hap2	B2-Hap2	TaF-box-Hap2
390	Zhongluo 5	Cultivated	HWW	B1-Hap2	B2-Hap2	TaF-box-Hap2
391	Zhongluotiegan	Cultivated	HWW	B1-Hap1	B2-Hap1	TaF-box-Hap1
392	B41011-1-8-4	Cultivated	YRWW	B1-Hap2	B2-Hap2	TaF-box-Hap2
393	B80205-1-2	Cultivated	YRWW	B1-Hap2	B2-Hap2	TaF-box-Hap2
394	B80488-1-1	Cultivated	HWW	B1-Hap2	B2-Hap2	TaF-box-Hap2
395	Luo 1104	Cultivated	HWW	B1-Hap2	B2-Hap2	TaF-box-Hap2
396	Luo 1106	Cultivated	HWW	B1-Hap2	B2-Hap2	TaF-box-Hap2
397	Zhongyu 1152	Cultivated	HWW	B1-Hap2	N	N
398	Zhongyu 1107	Cultivated	HWW	B1-Hap2	B2-Hap2	TaF-box-Hap2
399	Zhongyu 9302	Cultivated	HWW	B1-Hap2	B2-Hap2	TaF-box-Hap2
400	Qianyu 21	Cultivated	SWW	B1-Hap2	B2-Hap2	TaF-box-Hap2
401	Qian 11240-2	Cultivated	SWW	B1-Hap2	B2-Hap2	TaF-box-Hap2
402	Qian 110209-4	Cultivated	SWW	B1-Hap2	B2-Hap2	TaF-box-Hap2
403	Qian 11AF19-5	Cultivated	SWW	B1-Hap2	B2-Hap2	TaF-box-Hap2
404	Qian 090304-4	Cultivated	SWW	B1-Hap1	B2-Hap1	TaF-box-Hap1
405	Yangguang 838	Cultivated	SWW	B1-Hap2	B2-Hap2	TaF-box-Hap2
406	Nongda 1108	Cultivated	HWW	B1-Hap2	B2-Hap2	TaF-box-Hap2
407	Xumai 9158	Cultivated	HWW	B1-Hap1	B2-Hap1	TaF-box-Hap1
408	Kelin 0369	Cultivated	HWW	B1-Hap1	B2-Hap1	TaF-box-Hap1
409	Shannong 56	Cultivated	HWW	B1-Hap2	B2-Hap2	TaF-box-Hap2
410	Xianmai 2	Cultivated	HWW	B1-Hap2	B2-Hap2	TaF-box-Hap2
411	Zhengyumai 988	Cultivated	HWW	B1-Hap2	B2-Hap2	TaF-box-Hap2
412	Xumai 1145	Cultivated	HWW	B1-Hap2	B2-Hap2	TaF-box-Hap2
413	Heng 09-6186	Cultivated	HWW	B1-Hap2	B2-Hap2	TaF-box-Hap2
414	Jinli 106	Cultivated	HWW	B1-Hap2	B2-Hap2	TaF-box-Hap2
415	Guanmai 1	Cultivated	HWW	B1-Hap2	B2-Hap2	TaF-box-Hap2
416	Huaihe 09104	Cultivated	HWW	B1-Hap2	N	N
417	Luo 2708	Cultivated	HWW	B1-Hap1	B2-Hap1	TaF-box-Hap1
418	LS6045	Cultivated	HWW	B1-Hap2	B2-Hap2	TaF-box-Hap2
419	Shannong 70	Cultivated	HWW	B1-Hap2	B2-Hap2	TaF-box-Hap2
420	Jimai 325	Cultivated	HWW	B1-Hap2	B2-Hap2	TaF-box-Hap2
421	Xinong 266	Cultivated	HWW	B1-Hap2	B2-Hap2	TaF-box-Hap2
422	Fanmai 12	Cultivated	HWW	B1-Hap2	B2-Hap2	TaF-box-Hap2
423	Danshi 819	Cultivated	HWW	B1-Hap1	B2-Hap1	TaF-box-Hap1
424	Cunmai 8	Cultivated	HWW	B1-Hap2	B2-Hap2	TaF-box-Hap2
425	CP06-11-10-1 F7	Cultivated	HWW	B1-Hap2	B2-Hap2	TaF-box-Hap2
426	CP06-31-7-1-1 F7	Cultivated	HWW	B1-Hap2	B2-Hap2	TaF-box-Hap2
427	CP02-62-1-2-2-3 F10	Cultivated	HWW	B1-Hap2	B2-Hap2	TaF-box-Hap2
428	CP20-30-1-5-2-2-2-1-1 F12	Cultivated	HWW	B1-Hap2	B2-Hap2	TaF-box-Hap2
429	CP20-35-1-5-1-1-1 F12	Cultivated	HWW	B1-Hap2	B2-Hap2	TaF-box-Hap2
430	CP06-69-3-2-1 F18	Cultivated	HWW	B1-Hap2	B2-Hap2	TaF-box-Hap2
431	Yang 11	Cultivated	YRWW	B1-Hap1	B2-Hap1	TaF-box-Hap1
432	Yang 14	Cultivated	YRWW	B1-Hap2	B2-Hap2	TaF-box-Hap2
433	Yang 18	Cultivated	YRWW	B1-Hap2	B2-Hap2	TaF-box-Hap2
434	11-6005	Cultivated	YRWW	B1-Hap1	B2-Hap1	TaF-box-Hap1
435	11-6009	Cultivated	YRWW	B1-Hap1	B2-Hap1	TaF-box-Hap1
436	Huaimai 11	Cultivated	HWW	B1-Hap2	B2-Hap2	TaF-box-Hap2
437	Huaimai 16	Cultivated	HWW	B1-Hap2	B2-Hap2	TaF-box-Hap2
438	Huaimai 17	Cultivated	HWW	B1-Hap2	B2-Hap2	TaF-box-Hap2
439	Huaimai 18	Cultivated	HWW	B1-Hap2	B2-Hap2	TaF-box-Hap2
440	Huaimai 20	Cultivated	HWW	N	N	N
441	Huaimai 21	Cultivated	HWW	B1-Hap2	B2-Hap2	TaF-box-Hap2
442	Huaimai 22	Cultivated	HWW	B1-Hap2	B2-Hap2	TaF-box-Hap2
443	Huaimai 23	Cultivated	HWW	B1-Hap2	B2-Hap2	TaF-box-Hap2
444	Huaimai 24	Cultivated	HWW	B1-Hap2	B2-Hap2	TaF-box-Hap2
445	Huaimai 25	Cultivated	HWW	B1-Hap2	B2-Hap2	TaF-box-Hap2
446	Huaimai 26	Cultivated	HWW	B1-Hap2	B2-Hap2	TaF-box-Hap2
447	Huaimai 28	Cultivated	HWW	B1-Hap2	B2-Hap2	TaF-box-Hap2
448	Huaimai 29	Cultivated	HWW	B1-Hap2	B2-Hap2	TaF-box-Hap2
449	Huaimai 30	Cultivated	HWW	B1-Hap2	N	N
450	Huaimai 31	Cultivated	HWW	B1-Hap2	B2-Hap2	TaF-box-Hap2
451	Huaimai 0615	Cultivated	HWW	B1-Hap2	B2-Hap2	TaF-box-Hap2
452	Huaimai 0705	Cultivated	HWW	B1-Hap2	B2-Hap2	TaF-box-Hap2
453	Zhonghe-6	Cultivated	YRWW	B1-Hap2	B2-Hap2	TaF-box-Hap2
454	Zhonghe-57	Cultivated	YRWW	B1-Hap1	B2-Hap1	TaF-box-Hap1
455	Zhonghe-58	Cultivated	YRWW	B1-Hap1	B2-Hap1	TaF-box-Hap1
456	Zhonghe-59	Cultivated	YRWW	B1-Hap2	B2-Hap2	TaF-box-Hap2
457	Zhonghe-46	Cultivated	YRWW	B1-Hap1	B2-Hap1	TaF-box-Hap1
458	Zhonghe-72	Cultivated	YRWW	B1-Hap2	B2-Hap2	TaF-box-Hap2
459	Zhonghe-70	Cultivated	YRWW	N	N	N
460	Zhonghe-75	Cultivated	YRWW	B1-Hap1	B2-Hap1	TaF-box-Hap1
461	Zhonghe-108	Cultivated	YRWW	B1-Hap2	B2-Hap2	TaF-box-Hap2
462	Zhonghe-121	Cultivated	YRWW	B1-Hap2	B2-Hap2	TaF-box-Hap2
463	Zhonghe-119	Cultivated	YRWW	B1-Hap2	B2-Hap2	TaF-box-Hap2
464	Zhonghe-126	Cultivated	YRWW	B1-Hap1	B2-Hap1	TaF-box-Hap1
465	Zhonghe-123	Cultivated	YRWW	B1-Hap2	B2-Hap2	TaF-box-Hap2
466	Zhonghe-159	Cultivated	YRWW	B1-Hap1	N	N
467	Zhonghe-160	Cultivated	YRWW	B1-Hap1	B2-Hap1	TaF-box-Hap1
468	Zhonghe-157	Cultivated	YRWW	B1-Hap1	B2-Hap1	TaF-box-Hap1
469	Ruiquanmai 168	Cultivated	HWW	B1-Hap2	B2-Hap2	TaF-box-Hap2
470	Dehongfumai 2	Cultivated	HWW	B1-Hap1	B2-Hap1	TaF-box-Hap1
471	Yikemai 5	Cultivated	HWW	B1-Hap2	B2-Hap2	TaF-box-Hap2
472	Yannong 19	Cultivated	HWW	B1-Hap2	B2-Hap2	TaF-box-Hap2
473	Zhengyumai 0519	Cultivated	HWW	B1-Hap2	B2-Hap2	TaF-box-Hap2
474	Quanmai 890	Cultivated	HWW	B1-Hap2	B2-Hap2	TaF-box-Hap2
475	Xinmai 31	Cultivated	HWW	B1-Hap1	B2-Hap1	TaF-box-Hap1
476	Puxing 5	Cultivated	HWW	B1-Hap2	B2-Hap2	TaF-box-Hap2
477	Luomai 31	Cultivated	HWW	B1-Hap2	B2-Hap2	TaF-box-Hap2
478	Zhongzhongmai 10	Cultivated	HWW	B1-Hap2	B2-Hap2	TaF-box-Hap2
479	Zhumai 328	Cultivated	HWW	B1-Hap2	B2-Hap2	TaF-box-Hap2
480	Fengdecunmai 12	Cultivated	HWW	N	N	N
481	Xuke 718	Cultivated	HWW	B1-Hap2	B2-Hap2	TaF-box-Hap2
482	Yuliang 1688	Cultivated	HWW	B1-Hap2	B2-Hap2	TaF-box-Hap2
483	Yangguang 828	Cultivated	HWW	B1-Hap1	B2-Hap1	TaF-box-Hap1
484	Xinnong 518	Cultivated	HWW	B1-Hap2	B2-Hap2	TaF-box-Hap2
485	Huaichuan 919	Cultivated	HWW	B1-Hap2	B2-Hap2	TaF-box-Hap2
486	Xumai 262	Cultivated	HWW	B1-Hap2	B2-Hap2	TaF-box-Hap2
487	Zhongyu 1152	Cultivated	HWW	B1-Hap2	B2-Hap2	TaF-box-Hap2
488	Zhongfan 7093	Cultivated	HWW	B1-Hap1	B2-Hap1	TaF-box-Hap1
489	Annong 1206	Cultivated	YRWW	B1-Hap2	B2-Hap2	TaF-box-Hap2
490	Zhengmai 113	Cultivated	HWW	B1-Hap2	B2-Hap2	TaF-box-Hap2
491	Xinmai 2111	Cultivated	HWW	B1-Hap1	B2-Hap1	TaF-box-Hap1
492	Ruihua 1101	Cultivated	HWW	B1-Hap1	B2-Hap1	TaF-box-Hap1
493	Lankao 181	Cultivated	HWW	B1-Hap2	B2-Hap2	TaF-box-Hap2
494	Dehongfumai 6	Cultivated	HWW	B1-Hap1	B2-Hap1	TaF-box-Hap1
495	Xianmai 68	Cultivated	YRWW	B1-Hap2	B2-Hap2	TaF-box-Hap2
496	Xinong 529	Cultivated	HWW	B1-Hap2	B2-Hap2	TaF-box-Hap2
497	Xinong 585	Cultivated	HWW	B1-Hap2	B2-Hap2	TaF-box-Hap2
498	Lunmai 21	Cultivated	YRWW	B1-Hap2	B2-Hap2	TaF-box-Hap2
499	Tianbao 518	Cultivated	YRWW	B1-Hap2	B2-Hap2	TaF-box-Hap2
500	Yanke 028	Cultivated	YRWW	B1-Hap1	B2-Hap1	TaF-box-Hap1
501	Luo 4688	Cultivated	HWW	B1-Hap1	B2-Hap1	TaF-box-Hap1
502	Guomai 0801	Cultivated	HWW	B1-Hap2	B2-Hap2	TaF-box-Hap2
503	Xumai 6	Cultivated	HWW	B1-Hap1	B2-Hap1	TaF-box-Hap1
504	Guomai 0526	Cultivated	YRWW	B1-Hap1	B2-Hap1	TaF-box-Hap1
505	Fanmai 14	Cultivated	HWW	B1-Hap2	B2-Hap2	TaF-box-Hap2
506	W1028	Cultivated	HWW	B1-Hap2	B2-Hap2	TaF-box-Hap2
507	Caizhi 24	Cultivated	HWW	B1-Hap2	B2-Hap2	TaF-box-Hap2
508	Zhenmai 9	Cultivated	HWW	B1-Hap2	B2-Hap2	TaF-box-Hap2
509	Yimai 11	Cultivated	HWW	B1-Hap1	B2-Hap1	TaF-box-Hap1
510	HHW08-01	Cultivated	HWW	B1-Hap1	B2-Hap1	TaF-box-Hap1
511	Xinong 1211	Cultivated	HWW	B1-Hap1	B2-Hap1	TaF-box-Hap1
512	Huaishi 0916	Cultivated	HWW	B1-Hap1	B2-Hap1	TaF-box-Hap1
513	Fanmai 5039	Cultivated	HWW	B1-Hap2	B2-Hap2	TaF-box-Hap2
514	Annongdawh 2012-6	Cultivated	YRWW	B1-Hap1	B2-Hap1	TaF-box-Hap1
515	LemaiW 102070	Cultivated	YRWW	B1-Hap2	B2-Hap2	TaF-box-Hap2
516	Longke 1211	Cultivated	HWW	B1-Hap2	B2-Hap2	TaF-box-Hap2
517	Guoxinmai 5	Cultivated	HWW	B1-Hap2	B2-Hap2	TaF-box-Hap2
518	TQ1203	Cultivated	HWW	B1-Hap2	N	N
519	Jiabao 1	Cultivated	HWW	B1-Hap2	B2-Hap2	TaF-box-Hap2
520	Huiyan 77	Cultivated	HWW	B1-Hap2	N	N
521	Guomai 06011	Cultivated	HWW	B1-Hap2	B2-Hap2	TaF-box-Hap2
522	Yikemai 3	Cultivated	HWW	B1-Hap2	B2-Hap2	TaF-box-Hap2
523	Sui 1216	Cultivated	HWW	B1-Hap2	B2-Hap2	TaF-box-Hap2
524	Shannong 10-2	Cultivated	HWW	B1-Hap1	B2-Hap1	TaF-box-Hap1
525	Longke 1221	Cultivated	HWW	B1-Hap2	B2-Hap2	TaF-box-Hap2
526	Zhongmai 1	Cultivated	HWW	B1-Hap2	B2-Hap2	TaF-box-Hap2
527	Gushenmai 9	Cultivated	HWW	B1-Hap2	B2-Hap2	TaF-box-Hap2
528	Huihe 6	Cultivated	HWW	B1-Hap2	B2-Hap2	TaF-box-Hap2
529	Longmai 109	Cultivated	HWW	B1-Hap1	B2-Hap1	TaF-box-Hap1
530	Changhe 23	Cultivated	HWW	B1-Hap2	B2-Hap2	TaF-box-Hap2
531	Longanmai 968	Cultivated	HWW	B1-Hap2	B2-Hap2	TaF-box-Hap2
532	An 1211	Cultivated	HWW	B1-Hap2	B2-Hap2	TaF-box-Hap2
533	An 1243	Cultivated	HWW	B1-Hap2	B2-Hap2	TaF-box-Hap2
534	GR123	Cultivated	HWW	B1-Hap1	B2-Hap1	TaF-box-Hap1
535	Quanmai 1094	Cultivated	HWW	B1-Hap1	B2-Hap1	TaF-box-Hap1
536	Huiyan 22	Cultivated	HWW	B1-Hap2	B2-Hap2	TaF-box-Hap2
537	Guomai 12	Cultivated	HWW	B1-Hap2	B2-Hap2	TaF-box-Hap2
538	Weilai 6193	Cultivated	YRWW	B1-Hap1	B2-Hap1	TaF-box-Hap1
539	Haomai 16	Cultivated	YRWW	B1-Hap1	B2-Hap1	TaF-box-Hap1
HWW: Region of winter wheat in Yellow and Huaihai
NWW: Region of winter wheat in the North
SWW: Region of winter wheat in Southwest
YRWW: Region of winter wheat in Middle and Lower Yangtze River

[truncated: 1 more sheets: Table S11]
